# Supplementary material for: Syntheses, structure and properties of a new series of organic–inorganic Hg-based halides: adjusting halogens resulted in huge performance mutations
Source: Royal Society of Chemistry journal article supplement (doi:10.1039/d1dt01085a), 2021-01-01
Supplement: d1dt01085a1.pdf [file d1dt01085a1.pdf]

Supplementary information for

**Syntheses, structure and properties of a new series of  
organic-inorganic Hg-based halides: adjusting halogens  
resulted in huge performance mutations**

**Contents**

- Table S1.** Selected bond lengths (Å) for  $[\text{N}(\text{CH}_3)_4]\text{HgCl}_{0.63}\text{Br}_{2.37}$
- Table S2.** Selected bond lengths (Å) for  $[\text{N}(\text{CH}_3)_4]\text{HgBrI}_2$
- Table S3.** Selected bond lengths (Å) for  $[\text{N}(\text{CH}_3)_4]\text{HgCl}_{0.45}\text{I}_{2.55}$
- Table S4.** Selected bond angles (°) for  $[\text{N}(\text{CH}_3)_4]\text{HgCl}_{0.63}\text{Br}_{2.37}$
- Table S5.** Selected bond angles (°) for  $[\text{N}(\text{CH}_3)_4]\text{HgBrI}_2$
- Table S6.** Selected bond angles (°) for  $[\text{N}(\text{CH}_3)_4]\text{HgCl}_{0.45}\text{I}_{2.55}$ .
- Table S7.** Intermolecular C-H...X Interactions in  $[\text{N}(\text{CH}_3)_4]\text{HgCl}_{0.63}\text{Br}_{2.37}$  (Å, °)
- Table S8.** Infrared Vibrations ( $\text{cm}^{-1}$ ) for  $[\text{N}(\text{CH}_3)_4]\text{HgCl}_{0.45}\text{I}_{2.55}$
- 
- Figure S1.** Photographs of polycrystalline powders of  $[\text{N}(\text{CH}_3)_4]\text{HgCl}_{0.63}\text{Br}_{2.37}$  (a) ,  
 $[\text{N}(\text{CH}_3)_4]\text{HgBrI}_2$  (b) and  $[\text{N}(\text{CH}_3)_4]\text{HgCl}_{0.45}\text{I}_{2.55}$  (c)
- Figure S2.** Simulated and measured powder X-ray diffraction patterns of  
 $[\text{N}(\text{CH}_3)_4]\text{HgCl}_{0.63}\text{Br}_{2.37}$
- Figure S3.** Simulated and measured powder X-ray diffraction patterns of  
 $[\text{N}(\text{CH}_3)_4]\text{HgBrI}_2$
- Figure S4.** Simulated and measured powder X-ray diffraction patterns of  
 $[\text{N}(\text{CH}_3)_4]\text{HgCl}_{0.45}\text{I}_{2.55}$
- Figure S5.** EDS patterns of  $[\text{N}(\text{CH}_3)_4]\text{HgCl}_{0.63}\text{Br}_{2.37}$
- Figure S6.** EDS patterns of  $[\text{N}(\text{CH}_3)_4]\text{HgBrI}_2$
- Figure S7.** EDS patterns of  $[\text{N}(\text{CH}_3)_4]\text{HgCl}_{0.45}\text{I}_{2.55}$
- Figure S8.** The infrared spectrum of  $[\text{N}(\text{CH}_3)_4]\text{HgCl}_{0.63}\text{Br}_{2.37}$
- Figure S9.** The infrared spectrum of  $[\text{N}(\text{CH}_3)_4]\text{HgBrI}_2$
- Figure S10.** The infrared spectrum of  $[\text{N}(\text{CH}_3)_4]\text{HgCl}_{0.45}\text{I}_{2.55}$
- Figure S11.** The DSC curves of  $[\text{N}(\text{CH}_3)_4]\text{HgCl}_{0.63}\text{Br}_{2.37}$
- Figure S12.** The DSC curves of  $[\text{N}(\text{CH}_3)_4]\text{HgBrI}_2$
- Figure S13.** The DSC curves of  $[\text{N}(\text{CH}_3)_4]\text{HgCl}_{0.45}\text{I}_{2.55}$
- Figure S14.** Emission spectra of  $[\text{N}(\text{CH}_3)_4]\text{HgCl}_{0.63}\text{Br}_{2.37}$  under different excitation  
wavelengths.
- Figure S15.** Emission spectra of  $[\text{N}(\text{CH}_3)_4]\text{HgBrI}_2$  under different excitation  
wavelengths.
- Figure S16.** Emission spectra of  $[\text{N}(\text{CH}_3)_4]\text{HgCl}_{0.45}\text{I}_{2.55}$  under different excitation  
wavelengths.
- Figure S17.** The simulated refractive index of  $[\text{N}(\text{CH}_3)_4]\text{HgBrI}_2$

**Table S1.** Selected bond lengths (Å) for [N(CH<sub>3</sub>)<sub>4</sub>]HgCl<sub>0.63</sub>Br<sub>2.37</sub>

| bond      | lengths (Å) | bond     | lengths (Å) |
|-----------|-------------|----------|-------------|
| Hg1-Br6   | 2.485(5)    | Hg2-Cl5A | 2.23(2)     |
| Hg1-Br41  | 3.009(9)    | Hg2-Cl4A | 2.28(2)     |
| Hg1-Br2   | 2.500(5)    | N2-C1    | 1.45(2)     |
| Hg1-Br1   | 2.507(8)    | N2-C2    | 1.48(2)     |
| Hg1-Cl1A  | 2.23(2)     | N2-C5    | 1.48(2)     |
| Hg1-Cl4A1 | 2.88(5)     | N2-C6    | 1.48(2)     |
| Hg2-Br3   | 2.475(5)    | C3-N1    | 1.47(7)     |
| Hg2-Br4   | 2.533(8)    | C4-N1    | 1.63(6)     |
| Hg2-Br2   | 2.983(5)    | N1-C7    | 1.54(6)     |
| Hg2-Br5   | 2.531(10)   | N1-C8    | 1.5000(14)  |

<sup>1</sup>1+X,+Y,+Z; <sup>2</sup>-1+X,+Y,+Z**Table S2.** Selected bond lengths (Å) for [N(CH<sub>3</sub>)<sub>4</sub>]HgBrI<sub>2</sub>

| bond                | lengths (Å) | bond               | lengths (Å) |
|---------------------|-------------|--------------------|-------------|
| Hg2-Br2             | 2.651(4)    | N1-C1              | 1.480(14)   |
| Hg2-I2              | 2.845(3)    | N1-C3 <sup>2</sup> | 1.481(14)   |
| Hg2-I2 <sup>1</sup> | 2.845(3)    | N1-C3              | 1.481(14)   |
| Hg2-I3              | 2.666(5)    | N1-C2              | 1.486(14)   |
| Hg1-I1              | 2.682(4)    | N2-C5              | 1.474(14)   |
| Hg1-I2 <sup>2</sup> | 2.858(3)    | N2-C4 <sup>1</sup> | 1.489(12)   |
| Hg1-I2              | 2.858(3)    | N2-C4              | 1.489(12)   |
| Hg1-Br1             | 2.625(4)    | N2-C6              | 1.481(13)   |

<sup>1</sup>2-X,+Y,+Z; <sup>2</sup>1-X,+Y,+Z**Table S3.** Selected bond lengths (Å) for [N(CH<sub>3</sub>)<sub>4</sub>]HgCl<sub>0.45</sub>I<sub>2.55</sub>

| bond                | lengths (Å) | bond    | lengths (Å) |
|---------------------|-------------|---------|-------------|
| Hg1-I2              | 2.690(6)    | Hg2-I42 | 2.863(4)    |
| Hg1-I4              | 2.881(4)    | Hg2-Cl2 | 2.40(3)     |
| Hg1-I4 <sup>1</sup> | 2.881(4)    | N1-C3   | 1.482(14)   |
| Hg1-I5              | 2.666(11)   | N1-C4   | 1.479(14)   |
| Hg1-Cl1             | 2.40(3)     | N1-C5   | 1.479(14)   |
| Hg2-I1              | 2.733(12)   | N2-C1   | 1.479(14)   |
| Hg2-I3              | 2.658(6)    | N2-C2   | 1.480(14)   |
| Hg2-I4              | 2.863(4)    | N2-C6   | 1.49(3)     |

<sup>1</sup>2-X,+Y,+Z; <sup>2</sup>1-X,+Y,+Z**Table S4.** Selected bond angles (°) for [N(CH<sub>3</sub>)<sub>4</sub>]HgCl<sub>0.63</sub>Br<sub>2.37</sub>

| bond                     | angles (°) | bond                     | angles (°) |
|--------------------------|------------|--------------------------|------------|
| Br6-Hg1-Br4 <sup>1</sup> | 95.3(2)    | Cl5A-Hg2-Br2             | 96.1(16)   |
| Br6-Hg1-Br2              | 118.8(2)   | Cl5A-Hg2-Cl4A            | 105.9(18)  |
| Br6-Hg1-Br1              | 121.5(4)   | Cl4A-Hg2-Br3             | 129.8(14)  |
| Br6-Hg1-Cl4A1            | 86.9(7)    | Cl4A-Hg2-Br2             | 97.7(13)   |
| Br2-Hg1-Br41             | 89.34(19)  | Hg2-Br4-Hg1 <sup>2</sup> | 92.8(3)    |
| Br2-Hg1-Br1              | 118.7(4)   | Hg1-Br2-Hg2              | 95.35(17)  |

|                          |           |                           |           |
|--------------------------|-----------|---------------------------|-----------|
| Br2-Hg1-Cl4A1            | 87.2(7)   | C1-N2-C2                  | 110.9(19) |
| Br1-Hg1-Br4 <sup>1</sup> | 94.9(4)   | C1-N2-C5                  | 110.7(19) |
| Br1-Hg1-Cl4A1            | 105.4(12) | C1-N2-C6                  | 108.9(19) |
| Cl1A-Hg1-Br6             | 119.8(15) | C2-N2-C6                  | 108.7(19) |
| Cl1A-Hg1-Br2             | 121.2(15) | C5-N2-C2                  | 108.2(19) |
| Cl1A-Hg1-Cl4A1           | 100(2)    | C5-N2-C6                  | 109.4(19) |
| Br3-Hg2-Br4              | 120.5(3)  | C3-N1-C4                  | 112(4)    |
| Br3-Hg2-Br2              | 93.63(17) | C3-N1-C7                  | 119(4)    |
| Br3-Hg2-Br5              | 122.6(4)  | C3-N1-C8                  | 106(4)    |
| Br4-Hg2-Br2              | 91.0(2)   | C7-N1-C4                  | 123(4)    |
| Br5-Hg2-Br4              | 116.5(5)  | C8-N1-C4                  | 84(3)     |
| Br5-Hg2-Br2              | 91.8(5)   | C8-N1-C7                  | 105(3)    |
| Cl5A-Hg2-Br3             | 121.3(11) | Hg2-Cl4A-Hg1 <sup>2</sup> | 102.0(15) |

<sup>1</sup>1+X,+Y,+Z; <sup>2</sup>-1+X,+Y,+Z

**Table S5.** Selected bond angles (°) for [N(CH<sub>3</sub>)<sub>4</sub>]HgBrI<sub>2</sub>

| bond                    | angles (°) | bond                  | angles (°) |
|-------------------------|------------|-----------------------|------------|
| Br2-Hg2-I2 <sup>1</sup> | 111.32(9)  | C1-N1-C3 <sup>2</sup> | 111(3)     |
| Br2-Hg2-I2              | 111.32(9)  | C1-N1-C3              | 111(3)     |
| Br2-Hg2-I3              | 126.62(15) | C1-N1-C2              | 122(5)     |
| I2-Hg2-I2 <sup>1</sup>  | 96.36(13)  | C32-N1-C3             | 103(5)     |
| I3-Hg2-I2               | 103.40(11) | C3-N1-C2              | 104(3)     |
| I3-Hg2-I2 <sup>1</sup>  | 103.40(11) | C32-N1-C2             | 104(3)     |
| I1-Hg1-I2 <sup>2</sup>  | 109.31(10) | C5-N2-C4              | 99(2)      |
| I1-Hg1-I2               | 109.31(10) | C5-N2-C4 <sup>1</sup> | 99(2)      |
| I2-Hg1-I22              | 92.55(12)  | C5-N2-C6              | 115.5(15)  |
| Br1-Hg1-I1              | 123.47(14) | C4-N2-C4 <sup>1</sup> | 113(2)     |
| Br1-Hg1-I2 <sup>2</sup> | 108.91(10) | C6-N2-C4              | 114.3(11)  |
| Br1-Hg1-I2              | 108.91(10) | C6-N2-C4 <sup>1</sup> | 114.3(11)  |
| Hg2-I2-Hg1              | 100.23(9)  | C1-N1-C32             | 111(3)     |

<sup>1</sup>2-X,+Y,+Z; <sup>2</sup>1-X,+Y,+Z

**Table S6.** Selected bond angles (°) for [N(CH<sub>3</sub>)<sub>4</sub>]HgCl<sub>0.45</sub>I<sub>2.55</sub>

| bond                    | angles (°) | bond                   | angles (°) |
|-------------------------|------------|------------------------|------------|
| I2-Hg1-I4 <sup>1</sup>  | 109.75(14) | I3-Hg2-I4              | 112.03(13) |
| I2-Hg1-I4               | 109.75(14) | I3-Hg2-I4 <sup>2</sup> | 112.03(13) |
| I4-Hg1-I4 <sup>1</sup>  | 91.47(19)  | I4-Hg2-I4 <sup>2</sup> | 96.21(19)  |
| I5-Hg1-I2               | 122.7(5)   | Cl2-Hg2-I3             | 122(2)     |
| I5-Hg1-I4               | 109.4(3)   | Cl2-Hg2-I4             | 105.6(15)  |
| I5-Hg1-I4 <sup>1</sup>  | 109.4(3)   | Hg2-I4-Hg1             | 99.45(15)  |
| Cl1-Hg1-I2              | 128(3)     | C4-N1-C3               | 108(2)     |
| Cl1-Hg1-I4 <sup>1</sup> | 105.9(18)  | C5-N1-C3               | 108(2)     |
| Cl1-Hg1-I4              | 105.9(18)  | C5-N1-C4               | 109(2)     |

|                        |          |          |           |
|------------------------|----------|----------|-----------|
| I1-Hg2-I4 <sup>2</sup> | 102.2(2) | C1-N2-C2 | 115.4(16) |
| I1-Hg2-I4              | 102.2(2) | C1-N2-C6 | 93(6)     |
| I3-Hg2-I1              | 127.4(3) | C2-N2-C6 | 115(2)    |

<sup>1</sup>2-X,+Y,+Z; <sup>2</sup>1-X,+Y,+Z

**Table S7.** Intermolecular C-H $\cdots$ X Interactions in [N(CH<sub>3</sub>)<sub>4</sub>]HgCl<sub>0.63</sub>Br<sub>2.37</sub> (Å, °)

| C - H $\cdots$ X        | d (H $\cdots$ X) | d (C $\cdots$ X) | $\angle$ (C - H $\cdots$ X) |
|-------------------------|------------------|------------------|-----------------------------|
| [C1 - H1B $\cdots$ Br6] | 3.016            | 3.659            | 125.798                     |
| [C3- H3A $\cdots$ Br6]  | 2.676            | 3.755            | 136.18                      |
| [C7 - H7C $\cdots$ Br4] | 2.851            | 3.603            | 125.968                     |

**Table S8.** Infrared Vibrations (cm<sup>-1</sup>) for [N(CH<sub>3</sub>)<sub>4</sub>]HgCl<sub>0.45</sub>I<sub>2.55</sub>

| Wavenumber (cm <sup>-1</sup> ) | Assignments                 |
|--------------------------------|-----------------------------|
| 3030                           | $\nu$ (C-H)                 |
| 1475                           | $\delta$ (C-H)              |
| 1281                           | $\omega$ (CH <sub>2</sub> ) |
| 946                            | $\nu$ (C-N)                 |

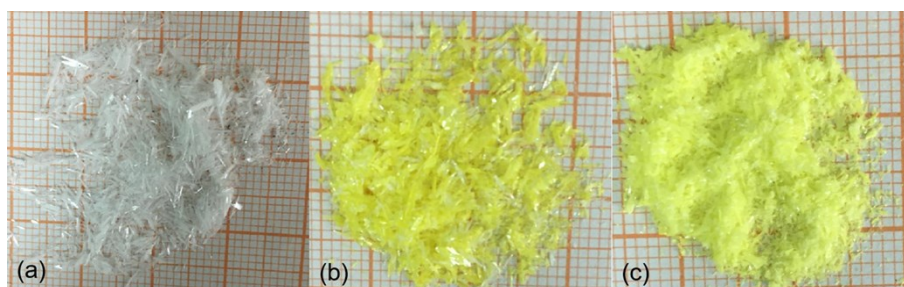

**Figure S1.** Photographs of polycrystalline powders of [N(CH<sub>3</sub>)<sub>4</sub>]HgCl<sub>0.63</sub>Br<sub>2.37</sub> (a)、[N(CH<sub>3</sub>)<sub>4</sub>]HgBrI<sub>2</sub> (b) and [N(CH<sub>3</sub>)<sub>4</sub>]HgCl<sub>0.45</sub>I<sub>2.55</sub> (c)

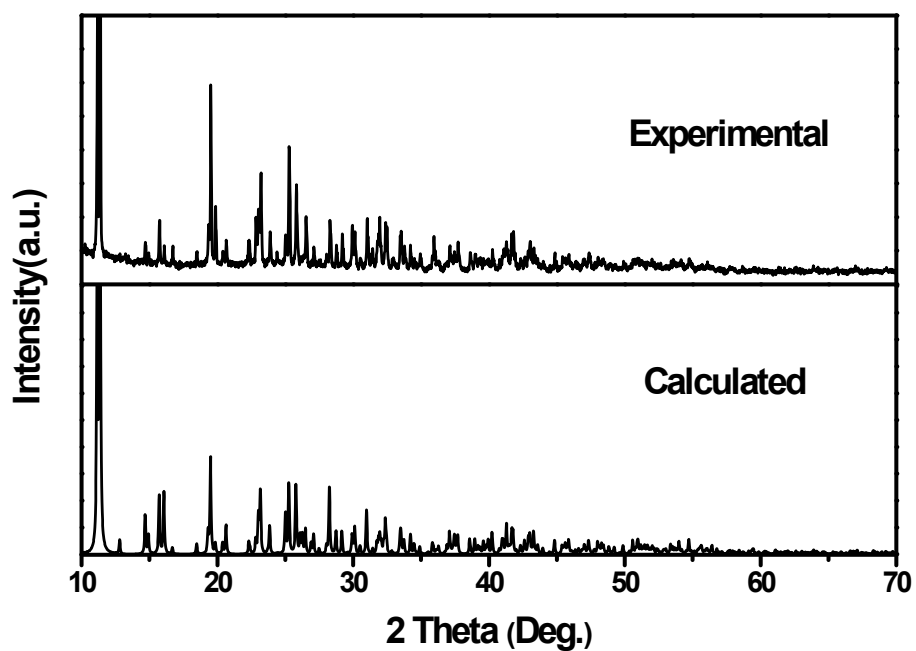

**Figure S2.** Simulated and measured powder X-ray diffraction patterns of  $[\text{N}(\text{CH}_3)_4]\text{HgCl}_{0.63}\text{Br}_{2.37}$

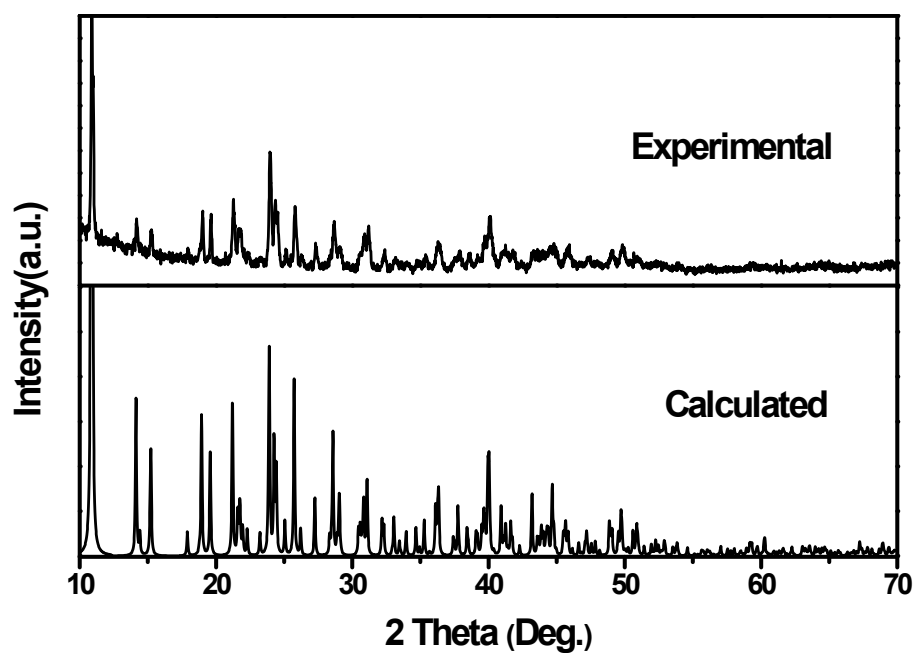

**Figure S3.** Simulated and measured powder X-ray diffraction patterns of  $[\text{N}(\text{CH}_3)_4]\text{HgBrI}_2$

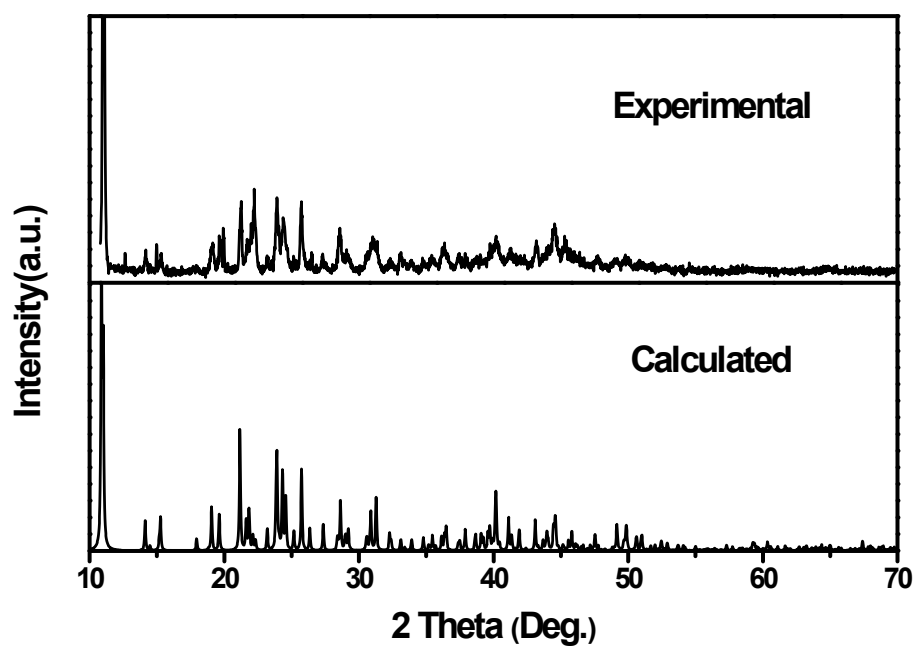

**Figure S4.** Simulated and measured powder X-ray diffraction patterns of  $[\text{N}(\text{CH}_3)_4]\text{HgCl}_{0.45}\text{I}_{2.55}$

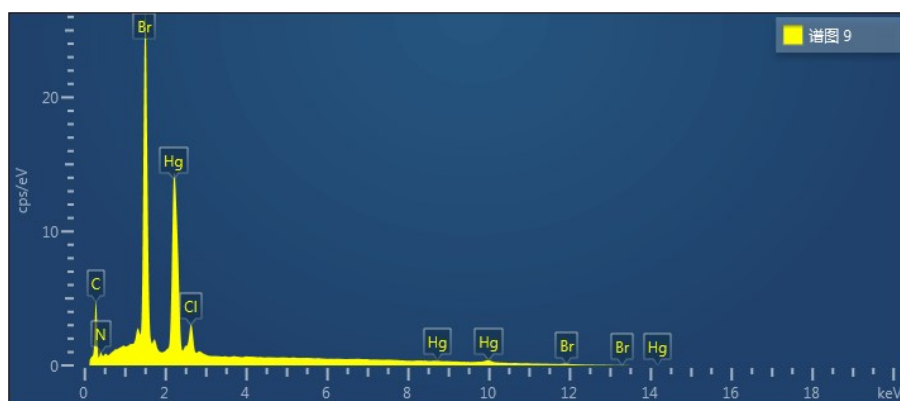

**Figure S5.** EDS patterns of  $[\text{N}(\text{CH}_3)_4]\text{HgCl}_{0.63}\text{Br}_{2.37}$

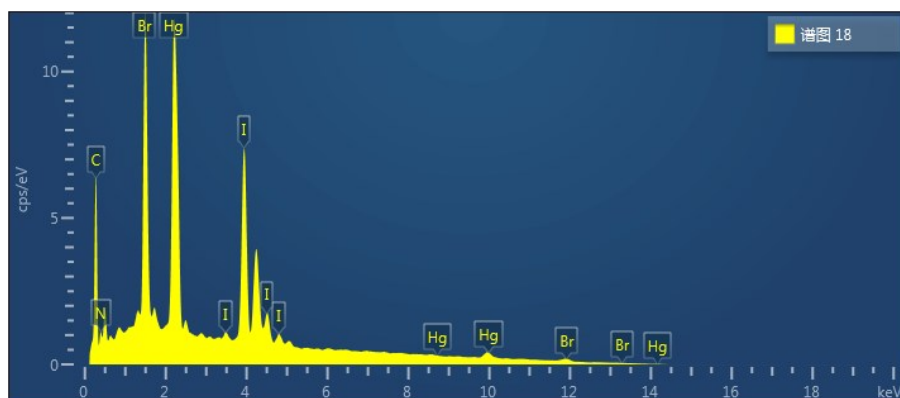

**Figure S6.** EDS patterns of  $[\text{N}(\text{CH}_3)_4]\text{HgBrI}_2$

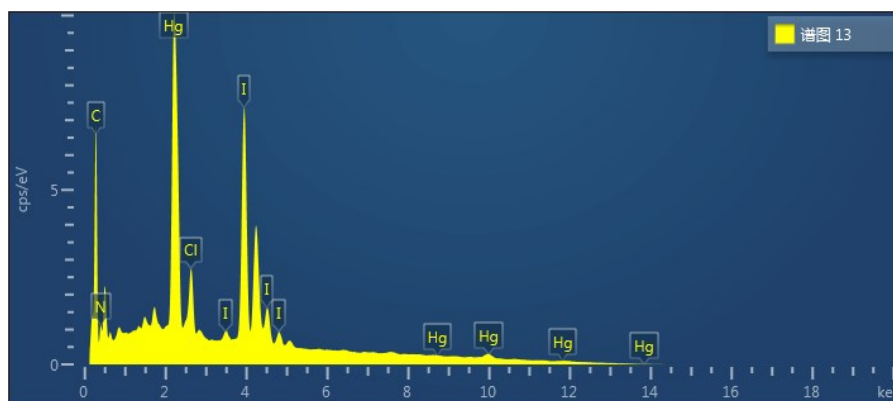

Figure S7. EDS patterns of  $[\text{N}(\text{CH}_3)_4]\text{HgCl}_{0.45}\text{I}_{2.55}$

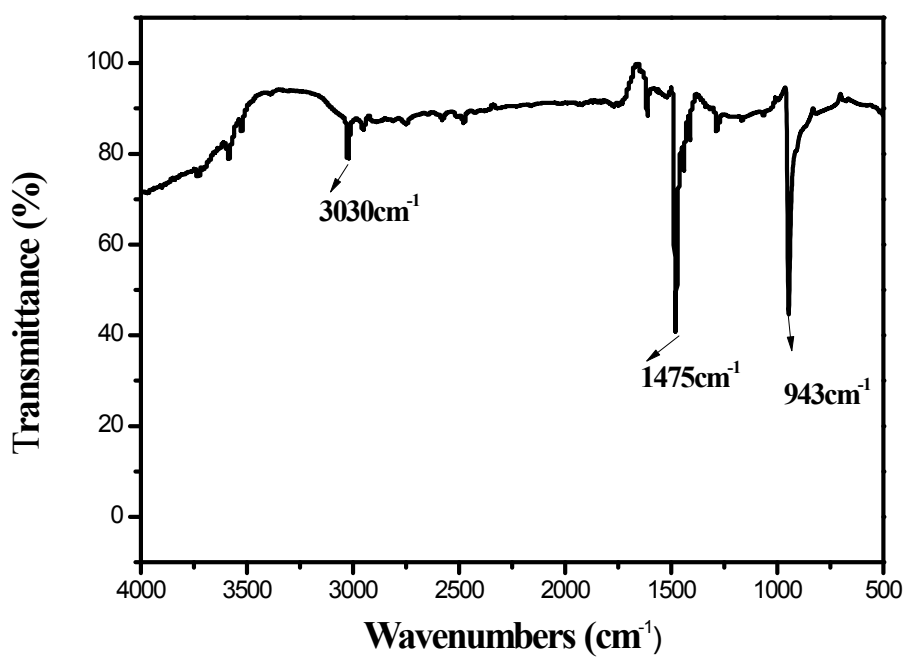

Figure S8. The infrared spectrum of  $[\text{N}(\text{CH}_3)_4]\text{HgCl}_{0.63}\text{Br}_{2.37}$

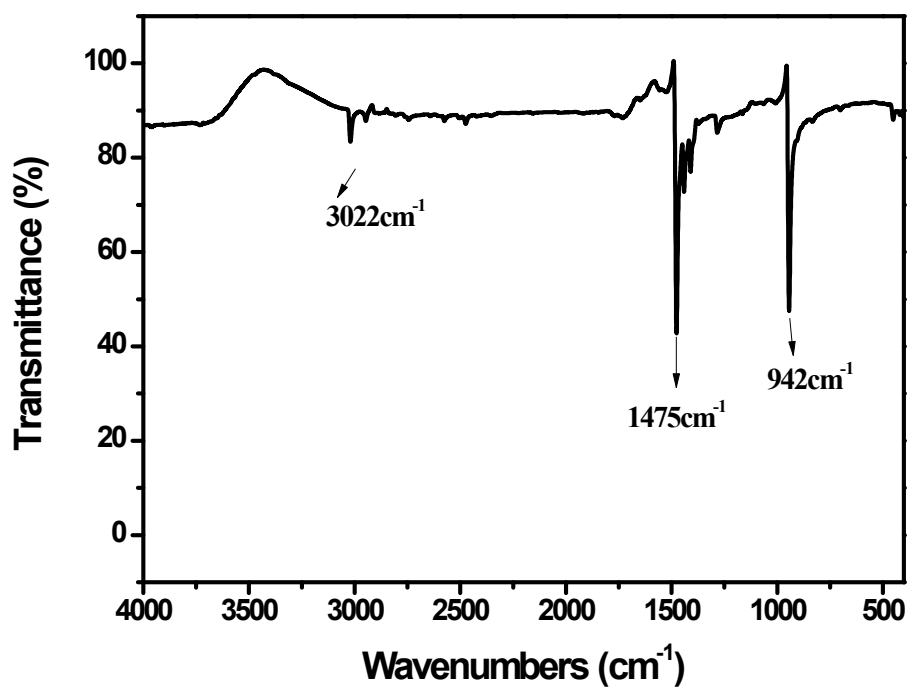

Figure S9. The infrared spectrum of [N(CH<sub>3</sub>)<sub>4</sub>]HgBrI<sub>2</sub>

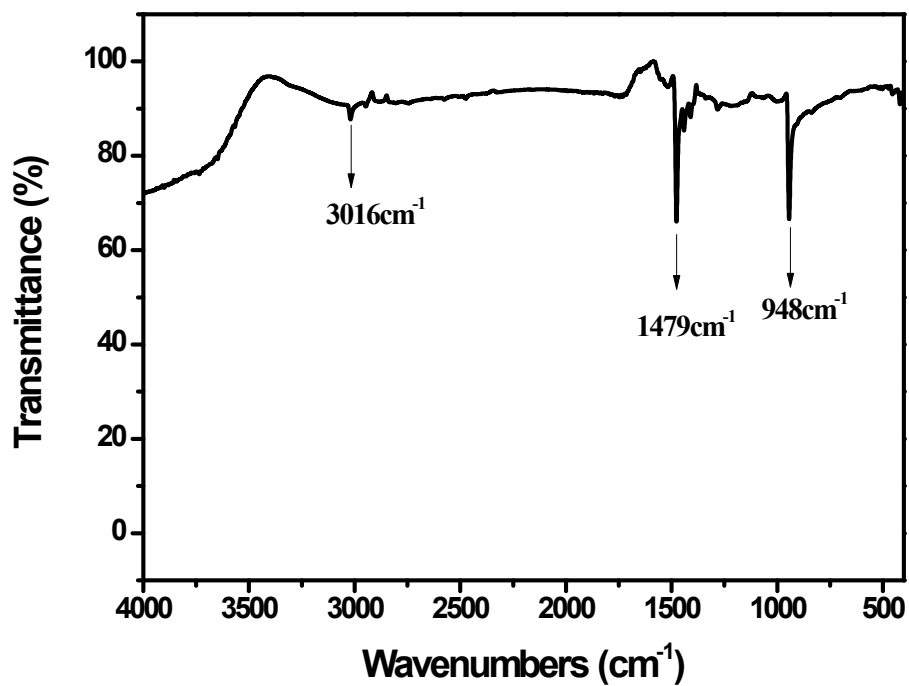

Figure S10. The infrared spectrum of [N(CH<sub>3</sub>)<sub>4</sub>]HgCl<sub>0.45</sub>I<sub>2.55</sub>



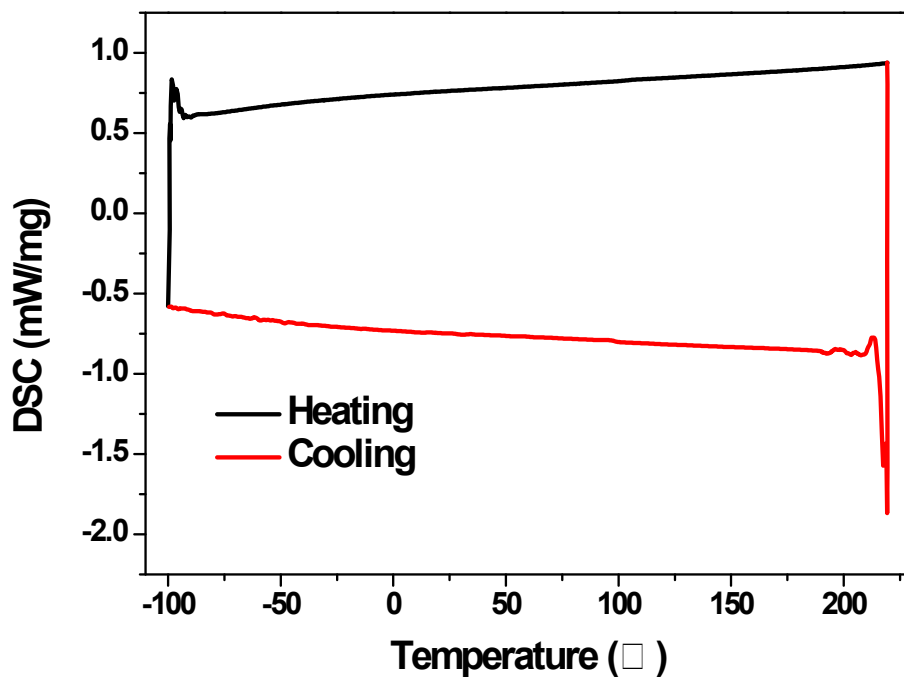

Figure S11. The DSC curves of  $[\text{N}(\text{CH}_3)_4]\text{HgCl}_{0.63}\text{Br}_{2.37}$

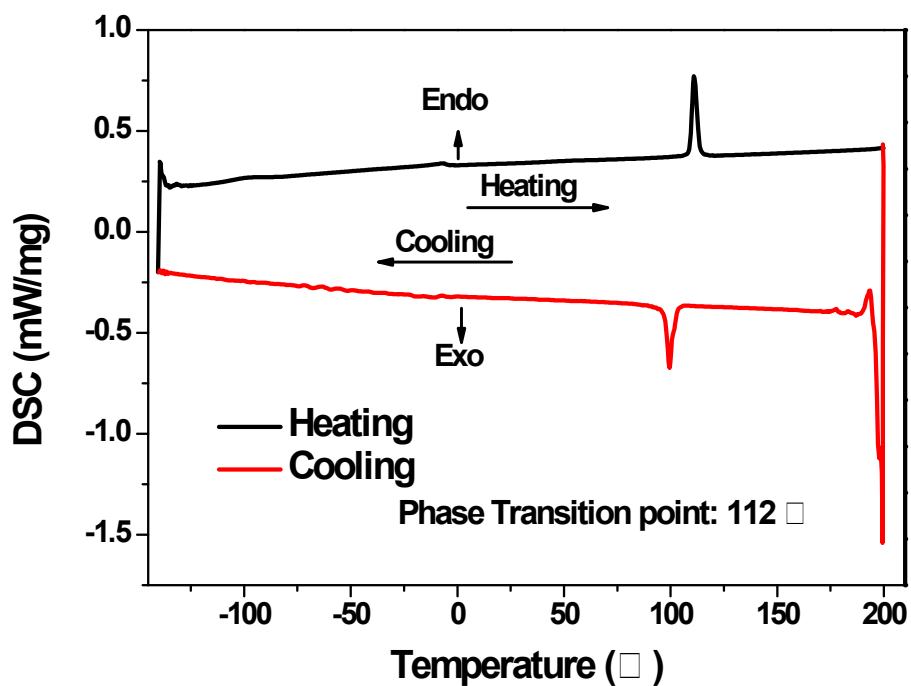

Figure S12. The DSC curves of  $[\text{N}(\text{CH}_3)_4]\text{HgBrI}_2$

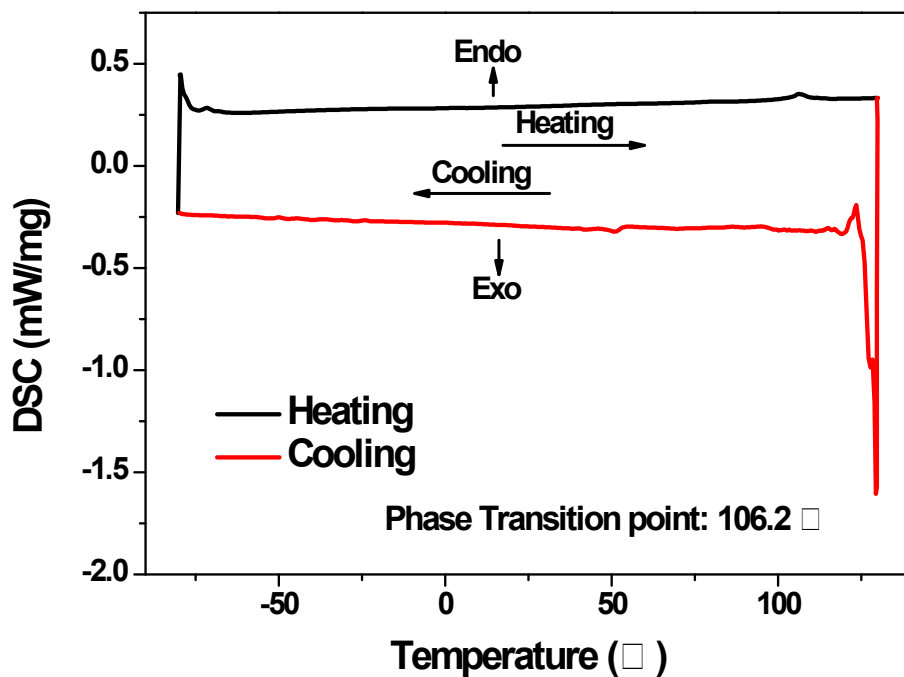

Figure S13. The DSC curves of  $[\text{N}(\text{CH}_3)_4]\text{HgCl}_{0.45}\text{I}_{2.55}$

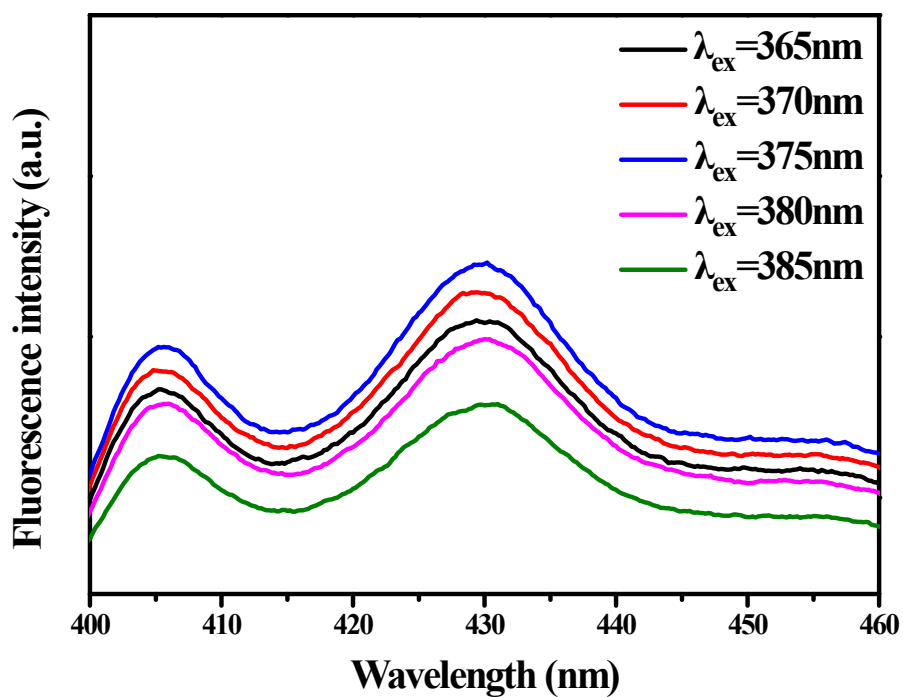

Figure S14. Emission spectra of  $[\text{N}(\text{CH}_3)_4]\text{HgCl}_{0.63}\text{Br}_{2.37}$  under different excitation wavelengths.

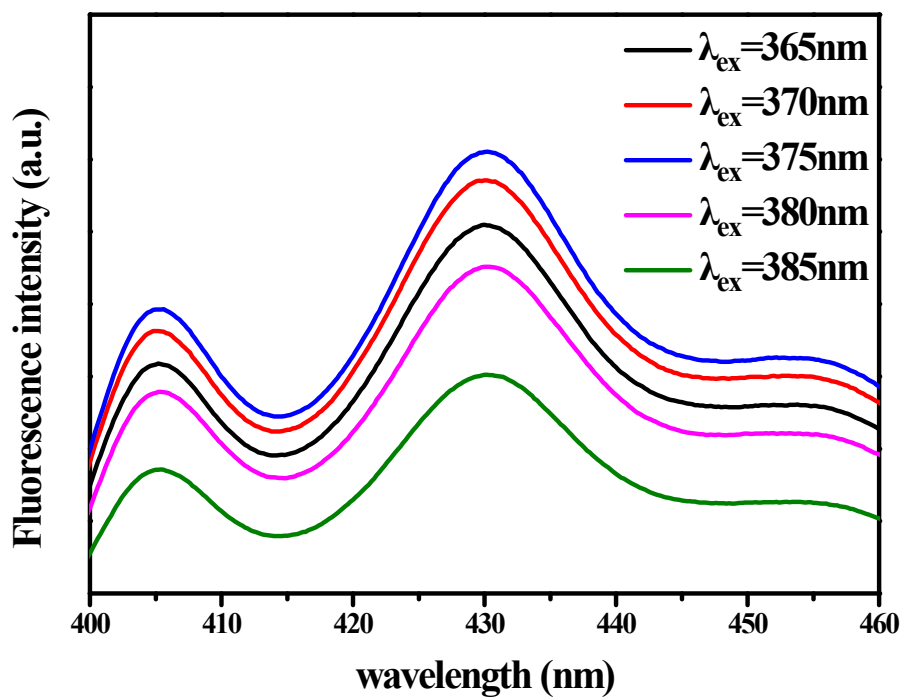

Figure S15. Emission spectra of  $[\text{N}(\text{CH}_3)_4]\text{HgBrI}_2$  under different excitation wavelengths.

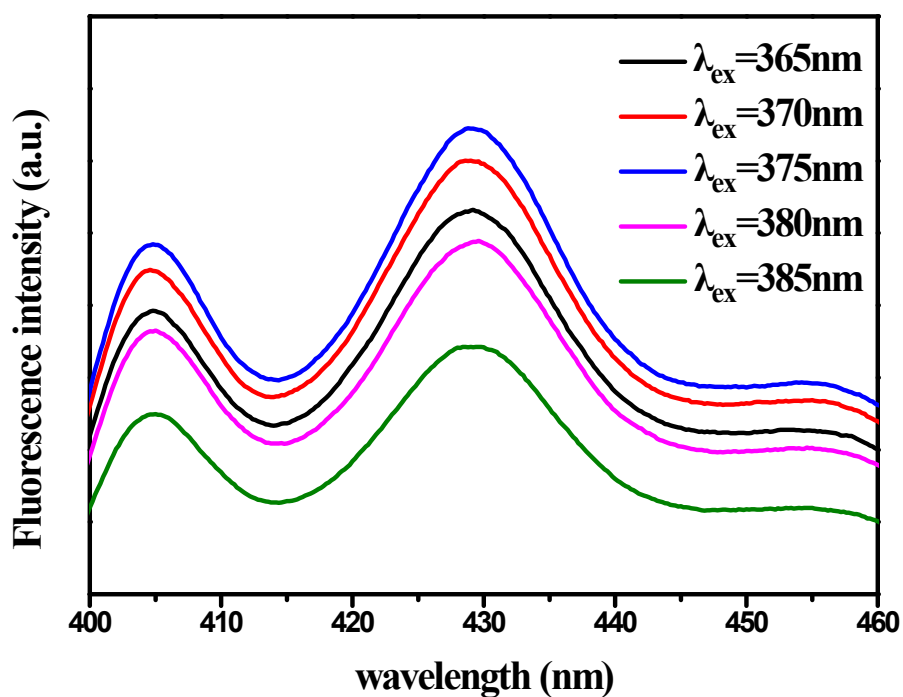

Figure S16. Emission spectra of  $[\text{N}(\text{CH}_3)_4]\text{HgCl}_{0.45}\text{I}_{2.55}$  under different excitation wavelengths.

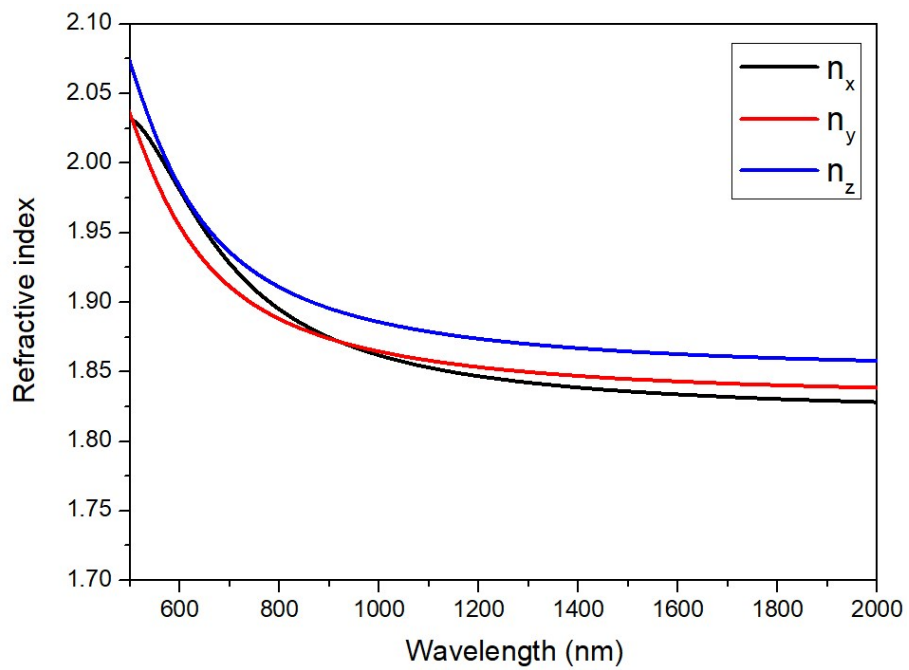

**Figure S17.** The simulated refractive index of  $[\text{N}(\text{CH}_3)_4]\text{HgBrI}_2$
